# Supplementary material
Source: PubMed Central journal article supplement (PMC2268812)
Supplement: pnas_0711034105_1.pdf [file pnas_0711034105_1.pdf]

1 : TATGTGTATGTATGTATGTATGTATGTATGTATGCAAGCTAGTGTATACAGCTAGGTGTATACGCATCCGCTACCTCTTCTATCTAACCACA 100  
101 : TTTAAACGCTCTGCAAGTACAGGGGGGTCGAGGTGCAGTAGCTTATATTTCACTGGGAGCAGCAGGGCCTTCGCTCCTCCCACACTAGACTGCTCCGCC 200  
201 : TCTCTCCGTGGAGGAGGCCGGGCTCACACTACTCACTCACTCGCACTGCGCCCACTGCCTGCTGATCATTCCCTCCCTCCGCTCTGCCGTCC 300  
301 : TCCTCCCTGTGAGAGAGAATCTCGCTCGCTCTGCATTCCGCAGAGAAACATCATGGTACAGTCCAAGAAGAAGTTTCGCGGCGTCAGGCAGCGCCACT 400  
M V Q S K K K F R G V R Q R H W  
401 : GGGGCTCCTGGGTCTCCGAGATCAGGCATCCTCTCCTGTAAGCCTCTCGTAGCTCTCTCTCTATAGCTGCTACCCCTACTCTCCGGCCTAGACT 500  
G S W V S E I R H P L L  
501 : CGTGTGGCTATCCACCGTGTCTGAGAGATAGATACATTGACTCTAGTTTGAATTGCCAACTGCTTTAAGGCTGCTTTCGTTGATTTTCTCTTGATGTG 600  
601 : TTCAAATGCATGCATGTATGTGTGTATGGTTACAGGAAGAGGAGGGTGTGGTTGGCACCTTTGAGACGGCGGAGGAGGCTGCGGGGGCTACGATGA 700  
K R R V W L G T F E T A E E A A R A Y D E  
701 : GGCTGCCATCCTGATGAGCGGGCGCAACGCCAAGACCAACTTCCCGTACCGAGGAGTGCCAACGGGGAGATCATCGTCGCCCCAGCAGCAGCAGCAGG 800  
A A I L M S G R N A K T N F P V P R S A N G E I I V A P A A A A R  
801 : GACATTCGCGGTGGCGTTGGCTCGTCGTCCTCCGGGGCCCGCGGCCAGCAGCCTGTACAGATCCTCAGCGCAAGCTCCGCAAGTGTGCAAGACAC 900  
D I R G G V G S S S S G A A G A S S L S Q I L S A K L R K C C K T P  
901 : CGTCCCCGTCCCTCACCTGCCTCCGCTCGACACCGAGAAGTCCCACATTGGCGTCTGGCAGAAGCGCGGGGTGCCCGTCCGACTCCAGCTGGGTGCAT 1000  
S P S L T C L R L D T E K S H I G V W Q K R A G A R A D S S W V M  
1001 : GACCGTCGAGCTCAACAAGGAGCCGGCCGAGCGGCACCACCAACGCCCAGCGACAGCAGGTGTGGCGACTCCTTCTCGTCCACGTCCACGTCCACA 1100  
T V E L N K E P A A A A P P T P S D S T V S A T P S S S T S T S T  
1101 : ACGGGCTCCCACCGGAGGCAATGGAGACGAAGAGAGGATCGCGCTGCAGATGATAGAGGAGCTGCTGAGCAGGAGCAGCCGGCTTCGCCGTACATG 1200  
T G S P P E A M E D E E R I A L Q M I E E L L S R S S P A S P S H G  
1201 : GGCTGCTGCAGGTGAAGAAGGCAGCCTCCTCATCTGAAGAAAAATATTGCACGGTTAAGAAAGTGTATCAGGTACCATCCAGATCAAGGATCTGGT 1300  
L L H G E E G S L L I \*  
1301 : AGGGTGGTTGGCGCACAAGCAGTTAAGATCATTGCTCCACATCGTAGGTACCAGCGAGTATCTCTCCATTACGCACTACGTAATAATCAAGCTTAGGAAA 1400  
1401 : CGATTAATACTACTGTGTATGTACGCGTGTGTGTAAGCCCTGTGATTTATAAATTAATCAAAGCTTACTTGTATGTAACCTAAGTATATGCCGTAC 1500  
1501 : CGTCATGATAGTCACACTATGTATCAACATCATCAGACTATATAGTACTACATGATTACGTATATA TCAATGATATCGCTTTCT AATAAA TGT AATAAAC 1600  
1601 : ACCTTGTAAATGCAGTACTTGTGCATTTGATTTCCCTTTGTTAGAGAACC TCAATGATATCGCTTTCT AATAAA TGT AATAAA CACCTTGTAAATGCAGTA 1700  
1701 : CTCTTGTGCATTTGATTTCCCTTTGTTAGAGAACCGATGATGTGTTGTTTT 1750
