# Supplementary material
Source: PubMed Central journal article supplement (PMC2268812)
Supplement: pnas_0711034105_5.pdf [file pnas_0711034105_5.pdf]

SI Table 1. Summary of chromosome walking steps.

| BAC clone ID (HNB) * | Probe used for library screening | Method of library screening <sup>†</sup> | Insert size (kb) <sup>‡</sup> | BAC end properties <sup>§</sup> | Derived marker and its source in parentheses <sup>¶</sup>         |
|----------------------|----------------------------------|------------------------------------------|-------------------------------|---------------------------------|-------------------------------------------------------------------|
| 1 506B03             | sKT9                             | PCR                                      | 85                            | lc/rep                          | BK91 (BAC F end), BK93 ( <i>Bam</i> H I subcloning)               |
| 2 225H15             | sKT9                             | PCR                                      | 110                           | lc/rep                          |                                                                   |
| 3 216M18             | BK91                             | PCR                                      | 125                           | rep/lc                          |                                                                   |
| 4 222C16             | BK91                             | PCR                                      | 150                           | lc/rep                          |                                                                   |
| 5 370O10             | BK91                             | PCR                                      | 105                           | lc/rep                          |                                                                   |
| 6 549K03             | BK93                             | PCR                                      | 105                           | both rep                        |                                                                   |
| 7 100N15             | ABRS3                            | PCR                                      | 109                           | both rep                        |                                                                   |
| 8 106O20             | ABRS3                            | PCR                                      | 64                            | rep/lc                          | wHNB322 (BAC R end)                                               |
| 9 615N19             | ABRS3                            | PCR                                      | 116                           | both rep                        |                                                                   |
| 10 624K08            | ABRS3                            | PCR                                      | 113                           | both rep                        |                                                                   |
| 11 652H03            | ABRS3                            | PCR                                      | 114                           | rep/lc                          | wHNB352 (BAC R end)                                               |
| 12 629A14            | ABRS3                            | PCR                                      | 105                           | both rep                        |                                                                   |
| 13 520D05            | wHNB352                          | HYB                                      | 104                           | lc/rep                          | wHNB371 (BAC F end)                                               |
| 14 589B20            | wHNB352                          | HYB                                      | 132                           | both rep                        | sHNB386 ( <i>Acc</i> I subcloning)                                |
| 15 035P04            | sHNB386                          | PCR                                      | 98                            | lc/rep                          | HNB391 (BAC F end)                                                |
| 16 058D05            | HNB391                           | PCR                                      | 89                            | both rep                        |                                                                   |
| 17 233N01            | HNB391                           | PCR                                      | 94                            | both lc                         | HNB3112 (BAC R end), HNB3115 and HNB3116 (both BAC sequence data) |
| 18 421N15            | HNB391                           | PCR                                      | 119                           | not analyzed                    |                                                                   |
| 19 526E13            | HNB391                           | PCR                                      | 100                           | not analyzed                    |                                                                   |
| 20 526K03            | HNB391                           | PCR                                      | 100                           | not analyzed                    |                                                                   |

\*Haruna Nijo BAC (HNB) clone ID name. Clones subjected to sequencing were marked in yellow; other critical BAC clones shown in Fig. 2A were marked in blue.

<sup>†</sup>HYB indicates hybridization to high-density colony membrane; PCR indicates PCR screening.

<sup>‡</sup>The insert size was estimated using pulse field gel electrophoresis, except for three clones (106O20, 035P04 and 233N01), which were completely shotgun-sequenced.

<sup>§</sup>BAC orientation is F end/ R end based on the M13 sequencing primers; lc indicates low copy, and rep indicates repetitive sequence.

<sup>¶</sup>BAC end indicates BAC end sequencing; the letter F or R denotes the BAC insert end side from which the marker was developed.
