# Supplementary material
Source: PubMed Central journal article supplement (PMC2268812)
Supplement: pnas_0711034105_6.pdf [file pnas_0711034105_6.pdf]

SI Table 2. Primer sequences of PCR markers used in *nud* mapping.

| Marker name | Primer name | Primer sequence (5'→3')           | Detection <sup>†</sup> |
|-------------|-------------|-----------------------------------|------------------------|
| 3G12        | F           | GGAGATCGTTCTTGGCTCAG              | CAPS                   |
|             | R           | ACCATTCCAGAACCAACTGC              |                        |
| sKT3        |             | See reference <sup>*</sup>        | STS                    |
| HNB3112     | F1          | TGTGCCTACACACATTCTGACA            | dCAPS                  |
|             | dR1         | CACTCATTTTTGCTTTGTATGTAGTCTTTTGGT |                        |
| HNB3117     | F2          | CGATTGGTGTGTGCTATGCT              | CAPS                   |
|             | R2          | GCGGAGATTAAGGTGGTGAA              |                        |
| HNB3116     | F1          | GGATGTAAGAGTCGCCACA               | CAPS                   |
|             | R1          | GAGGCCCATGCTCACTACAT              |                        |
| HNB3115     | F4          | GCTCATCCCTTTCTATGTATG             | CAPS                   |
|             | R2          | GCCTCCGCATCTCATTCTTA              |                        |
| HNB391      | F3          | CAGGTAGAGTGGCAAGAGAAG             | CAPS                   |
|             | R3          | AGCTCCCCCTAAATTTGTGC              |                        |
| sHNB386     | F1          | GACGTTCCCCAACATCTGG               | sequencing             |
|             | R1          | CCCCTACTGTCACTGGGAAA              |                        |
| wHNB352     | F1          | ACCTGGGCTAACTCATGTGC              | CAPS                   |
|             | R1          | GTGGAACAACCGGAACAAAC              |                        |
| ABRS3       | F1          | GTACCGAGGAGTGCCAAC                | STS                    |
|             | R1          | CTCTCTTCGTCCTCCATTG               |                        |
| wHNB322     | F1          | GAGCTTGGCTTGTTTTGGAG              | CAPS                   |
|             | R           | TTGGAAAATCTCGTGGGAAG              |                        |
| wHNB371     | F3          | GCGCTAGAACACCCAGAGAC              | STS                    |
|             | R2          | CCAACCTTACCGGCTACTCCA             |                        |
| BK93        | BFF2        | CTAGCCGCTCCAATCCATC               | CAPS                   |
|             | BFR2        | CATGGTCTTGATCTCCTCGTC             |                        |
| sKT9        |             | See reference <sup>*</sup>        | STS                    |
| BK91        | FF2         | CTTGCCAATTACCCTTACCA              | CAPS                   |
|             | FR2         | TGGAAGTATTAACCAGAAGGAA            |                        |
| ABRS9       | F1          | TTGCAAGACAGACCAGGCTA              | CAPS                   |
|             | R1          | TACATCATCGTCGGATCTGC              |                        |
| sKT5        |             | See reference <sup>*</sup>        | CAPS                   |
| 82C6        | F           | ATCATCAGGGTGAGATGCAA              | CAPS                   |
|             | R           | GCAGCAAGTGATTTTCGATGA             |                        |

<sup>\*</sup>Taketa *et al.* (2006).

<sup>†</sup>Types of markers; cleaved amplified polymorphic sequence (CAPS); sequence-tagged site (STS); derived cleaved amplified polymorphic sequence (dCAPS).
