# Supplementary material
Source: PubMed Central journal article supplement (PMC2268812)
Supplement: pnas_0711034105_7.pdf [file pnas_0711034105_7.pdf]

SI Table 3. Annotation of the BAC contig harboring *Nud* in table form.

| start  | end    | Classification        | Name/Accession No                           | strand |
|--------|--------|-----------------------|---------------------------------------------|--------|
| 128    | 806    | HNB3112 (marker)      | HNB3112 (marker)                            | for    |
| 2793   | 3247   | Gene 1 exon 3         | putative iron-deficiency specific 4 protein | rev    |
| 6196   | 6328   | Gene 1 exon 2         |                                             | rev    |
| 6454   | 6558   | Gene 1 exon 1         |                                             | rev    |
| 7295   | 7947   | HNB3117 (marker)      | HNB3117 (marker)                            | for    |
| 10055  | 10202  | DNA transposon, MITE  | stowaway, "Damocles_AV935714-1"             | rev    |
| 12501  | 14100  | HNB3116 (marker)      | HNB3116 (marker)                            | for    |
| 14670  | 15145  | Retrotransposon, LTR  | unknown superfamily, "Eugene_AF474072-1"    | for    |
| 15146  | 15643  | Retrotransposon, LTR  | gypsy, "Jeli_AY661558-1"                    | rev    |
| 19829  | 20287  | Retrotransposon, LTR  | unknown superfamily, "Eugene_AY663392-1"    | for    |
| 20287  | 20753  | Retrotransposon, LTR  | copla, "Georgia_AY853252-1"                 | rev    |
| 20485  | 20936  | Retrotransposon, LTR  | unknown superfamily, "Eugene_AY663392-1"    | for    |
| 21599  | 24262  | Retrotransposon, LTR  | athila, "Sabrina_745C13-1"                  | for    |
| 24362  | 26052  | Retrotransposon, LTR  | athila, "Sabrina_745C13-1"                  | for    |
| 26103  | 27056  | Retrotransposon, LTR  | athila, "Sabrina_1020F19-1"                 | for    |
| 27264  | 32121  | Retrotransposon, LTR  | athila, "Sabrina_AY494981-4"                | for    |
| 32620  | 33173  | Retrotransposon, LTR  | "WIS_426K20-1"                              | rev    |
| 32955  | 33491  | Retrotransposon, LTR  | "WIS_107G22-1"                              | rev    |
| 35405  | 37605  | Retrotransposon, LTR  | athila, "Sabrina_1020F19-1"                 | rev    |
| 40792  | 43798  | Retrotransposon, LTR  | copla, "BARE1_11o9-1"                       | rev    |
| 44504  | 54083  | Retrotransposon, LTR  | copla, "Angela_609E6-3"                     | for    |
| 55445  | 55915  | Retrotransposon, LTR  | athila, "Egug_AY268139-1"                   | rev    |
| 56190  | 60862  | Retrotransposon, LTR  | athila, "Sabrina_745C13-1"                  | rev    |
| 63187  | 65686  | HNB3115 (marker)      | HNB3115 (marker)                            | rev    |
| 74778  | 75928  | HNB391 (marker)       | HNB391 (marker)                             | for    |
| 76754  | 77309  | Retrotransposon, LTR  | copla, "Lara_102J11-2"                      | for    |
| 78376  | 78552  | DNA transposon, CACTA | "Caspar_453N11-1"                           | for    |
| 83846  | 84377  | Retrotransposon, LTR  | copla, "WIS_426K20-1"                       | rev    |
| 84621  | 84748  | Retrotransposon, LTR  | copla, "WIS_107G22-1"                       | rev    |
| 84917  | 88000  | Retrotransposon, LTR  | copla, "BARE1_11o9-1"                       | rev    |
| 88319  | 91422  | Retrotransposon, LTR  | copla, "Angela_609E6-3"                     | rev    |
| 94332  | 94980  | Retrotransposon, LTR  | athila, "WHAM_AF459088-1"                   | for    |
| 94350  | 95009  | Retrotransposon, LTR  | athila, "WHAM_115G1-1"                      | for    |
| 96384  | 96707  | Retrotransposon, LTR  | copla, "Maximus_AY643844-1"                 | rev    |
| 100928 | 114017 | Retrotransposon, LTR  | gypsy, "Haight_102J11-1"                    | rev    |
| 118924 | 119493 | Retrotransposon, LTR  | copla, "Maximus"                            | rev    |
| 120651 | 126178 | Retrotransposon, LTR  | athila, "Sabrina_102J11-18";                | rev    |
| 133221 | 138024 | Retrotransposon, LTR  | athila, "Sabrina_745C13-1"                  | for    |
| 145606 | 146153 | Retrotransposon, LTR  | copla, "WIS_426K20-1"                       | rev    |
| 152715 | 153004 | Retrotransposon, LTR  | copla, "WIS_426K20-1"                       | rev    |
| 153045 | 153262 | Retrotransposon, LTR  | copla, "WIS_426K20-1"                       | rev    |
| 153830 | 154028 | Retrotransposon, LTR  | copla, "Maximus_102J11-2"                   | rev    |
| 154075 | 154311 | Retrotransposon, LTR  | copla, "Maximus_AY643844-1"                 | rev    |
| 154391 | 154589 | Retrotransposon, LTR  | copla, "Maximus_AY643844-1"                 | rev    |
| 154589 | 155572 | Retrotransposon, LTR  | copla, "WIS_107G22-1"                       | for    |
| 154590 | 155631 | Retrotransposon, LTR  | copla, "BARE1_11o9-1"                       | for    |
| 157314 | 164299 | Retrotransposon, LTR  | athila, "Sabrina_745C13-1"                  | for    |
| 164326 | 165070 | Retrotransposon, LTR  | copla, "BARE1_11o9-1"                       | for    |
| 165074 | 165181 | Retrotransposon, LTR  | copla, "WIS_107G22-1"                       | for    |
| 165077 | 166310 | Retrotransposon, LTR  | copla, "BARE1_11o9-1"                       | for    |
| 166330 | 167848 | Retrotransposon, LTR  | gypsy, "BAGY2_AY643843-1"                   | for    |
| 167859 | 168699 | Retrotransposon, LTR  | copla, "WIS_426K20-1"                       | for    |
| 167897 | 168630 | Retrotransposon, LTR  | copla, "Angela_426K20-4"                    | for    |
| 168701 | 168932 | Retrotransposon, LTR  | athila, "Sabrina_745C13-1"                  | for    |
| 168946 | 169214 | Retrotransposon, LTR  | copla, "WIS_107G22-1"                       | for    |

SI Table 3. (continued).

| start  | end    | Classification                                   | Name/Accession No                          | strand |
|--------|--------|--------------------------------------------------|--------------------------------------------|--------|
| 169266 | 169483 | Retrotransposon, LTR                             | copia, "WIS_426K20-1"                      | for    |
| 169313 | 169472 | Retrotransposon, LTR                             | copia, "BARE1_11o9-1"                      | for    |
| 169337 | 169483 | Retrotransposon, LTR                             | copia, "WIS_107G22-1"                      | for    |
| 169415 | 169787 | Retrotransposon, LTR                             | copia, "Angela_609E6-3"                    | for    |
| 170655 | 171311 | sHNB386 (marker)                                 | athila, "Sabrina_745C13-1";                | for    |
| 170921 | 177410 | Retrotransposon, LTR                             | athila, "Sabrina_745C13-1"                 | for    |
| 177460 | 178581 | Retrotransposon, LTR                             | athila, "WHAM_AF459088-1"                  | for    |
| 184619 | 187834 | Retrotransposon, LTR                             | athila, "Sabrina_745C13-1"                 | rev    |
| 187835 | 188488 | Retrotransposon, LTR                             | gypsy, "BAGY2_AY643843-1"                  | for    |
| 188541 | 189694 | Retrotransposon, LTR                             | athila, "Sabrina_745C13-1"                 | rev    |
| 189702 | 190560 | Retrotransposon, LTR                             | copia, "WIS_107G22-1"                      | for    |
| 190432 | 190534 | Retrotransposon, LTR                             | copia, "Angela_426K20-4"                   | for    |
| 192204 | 194889 | Retrotransposon, LTR                             | copia, "Angela_426K20-4"                   | for    |
| 194935 | 197019 | Retrotransposon, LTR                             | copia, "BARE1_11o9-1"                      | for    |
| 197071 | 197360 | Retrotransposon, LTR                             | copia, "WIS_426K20-1"                      | for    |
| 198746 | 199002 | Retrotransposon, LTR                             | athila, "Sabrina_745C13-1"                 | rev    |
| 198996 | 201407 | Retrotransposon, LTR                             | gypsy, "BAGY2_AY643843-1"                  | for    |
| 202111 | 202272 | Retrotransposon, LTR                             | copia, "Maximus_AY643844-1"                | rev    |
| 205579 | 207092 | Retrotransposon, LTR                             | gypsy, "BAGY2_AY643843-1"                  | rev    |
| 214046 | 214314 | Retrotransposon, LTR                             | gypsy, "Heidi_453N11-1"                    | rev    |
| 214607 | 216313 | Retrotransposon, LTR                             | gypsy, "Erika1_TM_gag"                     | rev    |
| 222349 | 224145 | Retrotransposon, LTR                             | gypsy, "Sukkula_AY643843-1"                | for    |
| 223685 | 240364 | Deleted in naked cultivars of spontaneous origin |                                            | —      |
| 236983 | 237583 | Gene 2; Nud_exon 2                               | putative ethylene-responsive transcription | rev    |
| 237784 | 237866 | Gene 2; Nud_exon 1                               |                                            | rev    |
| 243214 | 243732 | wHNB322 (marker)                                 | wHNB322 (marker)                           | rev    |
