# Supplementary material
Source: PubMed Central journal article supplement (PMC2268812)
Supplement: pnas_0711034105_8.pdf [file pnas_0711034105_8.pdf]

SI Table 4. Primers used for gene structure and expression analyses.

| Primer application                     | Gene         | Locus name               | Forward Primer (5'→3')                                          | Reverse Primer (5'→3')                                |
|----------------------------------------|--------------|--------------------------|-----------------------------------------------------------------|-------------------------------------------------------|
| Detection of deletion by long PCR      |              | HNB32C2                  | F13:GAGCGTTTGGTGGTACCTGT                                        | R8:CGTGCTCGACTCCTAGTTCC                               |
| Three primer PCR assay of the deletion |              | HNB32C2-2                | wF2:GCTTGCAGTTACAGAGCTACTACTAC                                  | kR1:CCTCACCACTTAACCATGTCTG<br>tR2:GCGGTCCTTTCTTTCCAGT |
| Direct sequencing                      | <i>Nud</i>   | ABRS3-S1                 | F6:AGGCACACGTACTCCCAGTC                                         | RACER2:CGTTGGCACTCCTCGGTAC                            |
|                                        |              | ABRS3-S2                 | F14:CTCCCCACACTAGACTGCTCC                                       | RACER1:GAGGATCTGTGACAGGCTGC                           |
|                                        |              | ABRS3-S3                 | F1:GTACCGAGGAGTGCCAAC                                           | R5:TGGAGAGATACTCGGCTGGT                               |
|                                        |              | ABRS3-S4                 | F7:GCAATGGAGGACGAAGAGAG                                         | R12:GGTGATGAGAAACCTTGGCTG                             |
|                                        | <i>nud</i>   | HNB32C2-2                | wF2:GCTTGCAGTTACAGAGCTACTACTAC                                  | kR1:CCTCACCACTTAACCATGTCTG                            |
|                                        |              | HNB32C2-3                | F1:ACATTGGTTAGACGCCAAGG                                         | kR1:CCTCACCACTTAACCATGTCTG                            |
|                                        |              | HNB32C2-4                | F1:ACATTGGTTAGACGCCAAGG                                         | kR2:GAGTGTTGGTCCCACCTGAG                              |
| RT-PCR                                 | <i>Actin</i> | cMWG645                  | F:TTGAAGTACCCGATCGAGCATG                                        | R:CAGGCAGCTCATAGCTCTTCTC                              |
|                                        | <i>Nud</i>   | ABRS3-E1                 | F13:ACTGCCTGCTGATCATTCT                                         | R5:TGGAGAGATACTCGGCTGGT                               |
| RACE (Invitrogen)                      | <i>Nud</i>   | 5' end of cDNA (1st PCR) | Abridged Anchor Primer<br>GGCCACGCGTCGACTAGTACGGGIIGGGIIGGGIIG  | GSP1<br>RACER1:GAGGATCTGTGACAGGCTGC                   |
|                                        |              | 5' end of cDNA (2nd PCR) | Abridged Universal Amplification Primer<br>GGCCACGCGTCGACTAGTAC | GSP2<br>RACER2:CGTTGGCACTCCTCGGTAC                    |
|                                        |              | 3' end of cDNA (1st PCR) | GSP1<br>RTF1:TCAGGCATCCTCTCCTGAAGA                              | RACE adapter<br>GGCCACGCGTCGACTAGTAC                  |
|                                        |              | 3' end of cDNA (2nd PCR) | GSP2<br>F1:GTACCGAGGAGTGCCAAC                                   | RACE adapter<br>GGCCACGCGTCGACTAGTAC                  |
