# Supplementary material
Source: PubMed Central journal article supplement (PMC2268812)
Supplement: pnas_0711034105_9.pdf [file pnas_0711034105_9.pdf]

SI Table 5. Natural allelic variation in the 1.7-kb sequence harboring the *Nud* candidate gene.

| Polymorphism           |     | TATA upstream       |       | 5' UTR           |                     | intron 1          |       | exon 2 (changed nucleotide position within a codon) |         |         |         |         |         |         |         |         |         |         |         |  |
|------------------------|-----|---------------------|-------|------------------|---------------------|-------------------|-------|-----------------------------------------------------|---------|---------|---------|---------|---------|---------|---------|---------|---------|---------|---------|--|
| nt position in CDS     |     |                     |       |                  |                     |                   |       | 132 (3)                                             | 204 (3) | 235 (1) | 242 (1) | 399 (3) | 474 (3) | 477 (3) | 505 (1) | 528 (3) | 533 (2) | 558 (3) |         |  |
| nt change              |     | (GTAT) <sub>n</sub> |       | (G) <sub>n</sub> | (ACTC) <sub>n</sub> | (CT) <sub>n</sub> | C→T   | G→A                                                 | T→C     | G→A     | C→T     | C→T     | C→G     | A→G     | A→G     | G→A     | C→T     | A→G     | 84 bp   |  |
| aa change              |     | no                  |       | no               | no                  | no                | no    | no (A)                                              | no (S)  | A→T     | A→V     | no (G)  | no (A)  | no (A)  | T→A     | no (S)  | T→M     | no (P)  | dup.    |  |
| aa position            |     |                     |       |                  |                     |                   |       | 44                                                  | 69      | 79      | 81      | 133     | 158     | 159     | 169     | 176     | 178     | 186     |         |  |
| Acc. Name <sup>†</sup> | row | origin              | SSR-1 | indel-1          | SSR-2               | SSR-3             | SNP-1 | SNP-2                                               | SNP-3   | SNP-4   | SNP-5   | SNP-6   | SNP-7   | SNP-8   | SNP-9   | SNP-10  | SNP-11  | SNP-12  | indel-2 |  |
| Haruna Nijo            | 2   | Japan               | 11    | 7                | 5                   | 7                 | C     | G                                                   | T       | G       | C       | C       | C       | A       | A       | G       | C       | A       | dup     |  |
| OU T212                | 2   | Turkey              | 11    | 7                | 5                   | 7                 | C     | G                                                   | T       | G       | C       | C       | C       | A       | A       | G       | C       | A       | dup     |  |
| Foma                   | 2   | Sweden              | 12    | 7                | 5                   | 7                 | C     | G                                                   | T       | G       | C       | C       | C       | A       | A       | G       | C       | A       | dup     |  |
| Haisa                  | 2   | Germany             | 12    | 7                | 5                   | 7                 | C     | G                                                   | T       | G       | C       | C       | C       | A       | A       | G       | C       | A       | dup     |  |
| OU I029                | 2   | Iran                | 12    | 7                | 5                   | 7                 | C     | G                                                   | T       | G       | C       | C       | C       | A       | A       | G       | C       | A       | dup     |  |
| OU T334                | 6   | Turkey              | 12    | 7                | 5                   | 7                 | C     | G                                                   | T       | G       | C       | C       | C       | A       | A       | G       | C       | A       | dup     |  |
| OU I677                | 6   | Pakistan            | 12    | 7                | 5                   | 7                 | C     | G                                                   | T       | G       | C       | C       | C       | A       | A       | G       | C       | A       | dup     |  |
| A. Donaria             | 2   | Germany             | 13    | 7                | 5                   | 7                 | C     | G                                                   | T       | G       | C       | C       | C       | A       | A       | G       | C       | A       | dup     |  |
| Bowman                 | 2   | USA                 | 13    | 7                | 5                   | 7                 | C     | G                                                   | T       | G       | C       | C       | C       | A       | A       | G       | C       | A       | dup     |  |
| OU E269                | 2D  | Ethiopia            | 13    | 7                | 5                   | 7                 | C     | G                                                   | T       | G       | C       | C       | C       | A       | A       | G       | C       | A       | dup     |  |
| OU I624                | 6   | Afghanistan         | 13    | 7                | 5                   | 7                 | C     | G                                                   | T       | G       | C       | C       | C       | A       | A       | G       | C       | A       | dup     |  |
| OU J301                | 6   | Japan               | 13    | 7                | 5                   | 7                 | C     | G                                                   | T       | G       | C       | C       | C       | A       | A       | G       | C       | A       | dup     |  |
| OU J714                | 6   | Japan               | 13    | 7                | 5                   | 7                 | C     | G                                                   | T       | G       | C       | C       | C       | A       | A       | G       | C       | A       | dup     |  |
| Bonus                  | 2   | Sweden              | 14    | 7                | 5                   | 7                 | C     | G                                                   | T       | G       | C       | C       | C       | A       | A       | G       | C       | A       | dup     |  |
| Triumph                | 2   | UK                  | 14    | 7                | 5                   | 7                 | C     | G                                                   | T       | G       | C       | C       | C       | A       | A       | G       | C       | A       | dup     |  |
| Golden Promise         | 2   | Australia           | 14    | 7                | 5                   | 7                 | C     | G                                                   | T       | G       | C       | C       | C       | A       | A       | G       | C       | A       | dup     |  |
| OU E215                | 6   | Ethiopia            | 11    | 7                | 5                   | 7                 | T     | G                                                   | T       | G       | C       | C       | C       | A       | A       | G       | C       | A       | dup     |  |
| OU E229                | 2   | Ethiopia            | 11    | 7                | 5                   | 7                 | T     | G                                                   | T       | G       | C       | C       | C       | A       | A       | G       | C       | A       | dup     |  |
| OU H663                | 6   | Soviet Union        | 7     | 7                | 5                   | 7                 | T     | G                                                   | T       | G       | C       | C       | C       | A       | A       | G       | C       | A       | single  |  |
| OU H823                | 6   | Tibet               | 7     | 7                | 5                   | 7                 | T     | G                                                   | T       | G       | C       | C       | C       | A       | A       | G       | C       | A       | single  |  |
| OU J080                | 6   | Japan               | 10    | 7                | 5                   | 7                 | T     | G                                                   | T       | G       | C       | C       | C       | A       | A       | G       | C       | A       | single  |  |
| OU H602                | 2   | unknown             | 10    | 7                | 5                   | 7                 | T     | G                                                   | T       | G       | C       | C       | C       | A       | A       | G       | C       | A       | single  |  |
| OU H639                | 2   | Turkey              | 5     | 6                | 5(SNP) <sup>‡</sup> | 12                | T     | G                                                   | T       | G       | C       | C       | C       | A       | A       | G       | C       | A       | single  |  |
| OU I030                | 6   | Iran                | 7     | 7                | 5                   | 7                 | T     | G                                                   | T       | G       | C       | C       | C       | A       | A       | G       | T       | A       | single  |  |
| OU T329                | 6   | Turkey              | 7     | 7                | 5                   | 7                 | T     | G                                                   | T       | G       | C       | C       | C       | A       | A       | G       | T       | A       | single  |  |
| OU H632                | 2   | Iran                | 7     | 7                | 5                   | 7                 | T     | G                                                   | T       | G       | C       | C       | C       | A       | A       | G       | T       | A       | single  |  |
| OU H625                | 2   | Iran                | 6     | 6                | 5                   | 2+(GT)+8          | T     | A                                                   | T       | G       | C       | T       | C       | A       | A       | G       | C       | A       | single  |  |
| OU H774                | 2   | Afghanistan         | 8     | 6                | 5                   | 2+(GT)+7          | T     | A                                                   | T       | G       | C       | T       | C       | A       | A       | G       | C       | A       | single  |  |
| OU H637                | 2   | Syria               | 5     | 7                | 5                   | 8                 | T     | G                                                   | C       | G       | C       | C       | G       | A       | A       | A       | C       | G       | single  |  |
| OU H638                | 2   | Jordan              | 5     | 7                | 5                   | 8                 | T     | G                                                   | C       | G       | C       | C       | G       | A       | A       | A       | C       | G       | single  |  |
| OU I444                | 6   | Afghanistan         | 6     | 6                | 4                   | 10                | T     | G                                                   | C       | A       | C       | C       | G       | A       | A       | G       | C       | A       | single  |  |
| OU H725                | 2   | Turkey              | 8     | 6                | 5                   | 10                | T     | G                                                   | C       | G       | T       | C       | G       | G       | A       | G       | C       | A       | single  |  |
| OU H737                | 2   | Iraq                | 5     | 6                | 5(SNP) <sup>§</sup> | 2+(GT)+7          | T     | G                                                   | C       | G       | C       | C       | G       | G       | G       | G       | C       | A       | single  |  |

\* Numbers in parentheses show a substituted nucleotide position within a triplet codon, <sup>†</sup>OU H indicates wild barley either subsp. *spontaneum* (two-rowed) or subsp. *agriocrithon* (six-rowed); others are domesticated barley, <sup>‡</sup>4th (ACTC) motif changed to (AGTC), <sup>§</sup>2nd (ACTC) motif changed to (ACCC).
