# Supplementary material
Source: PubMed Central journal article supplement (PMC2268812)

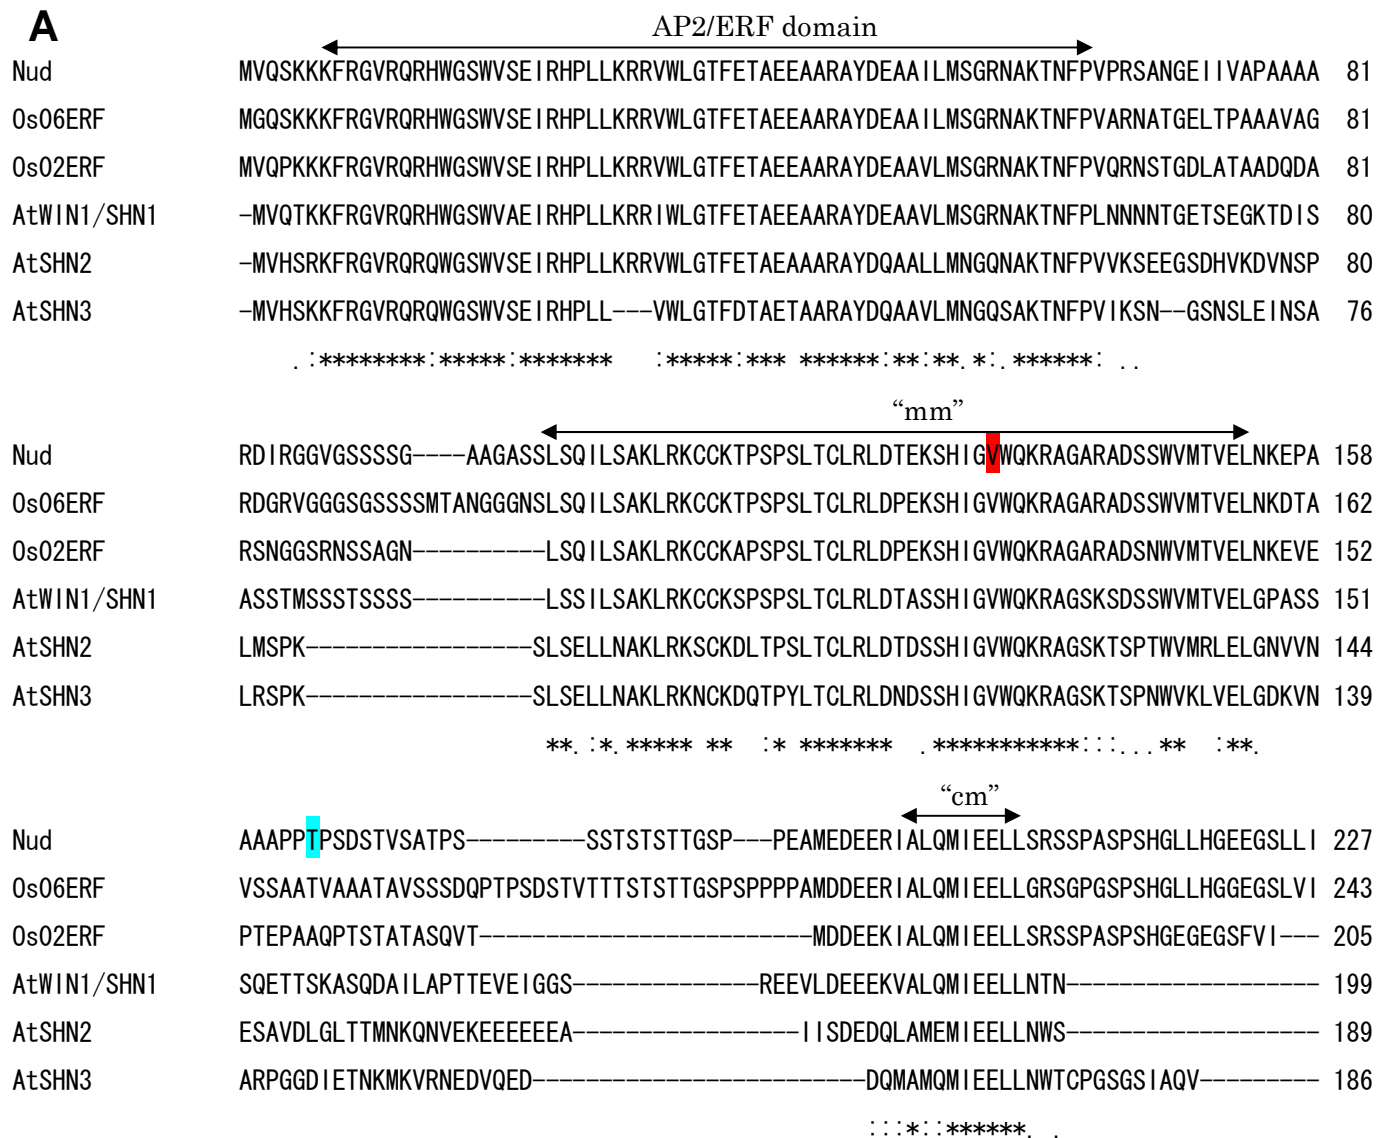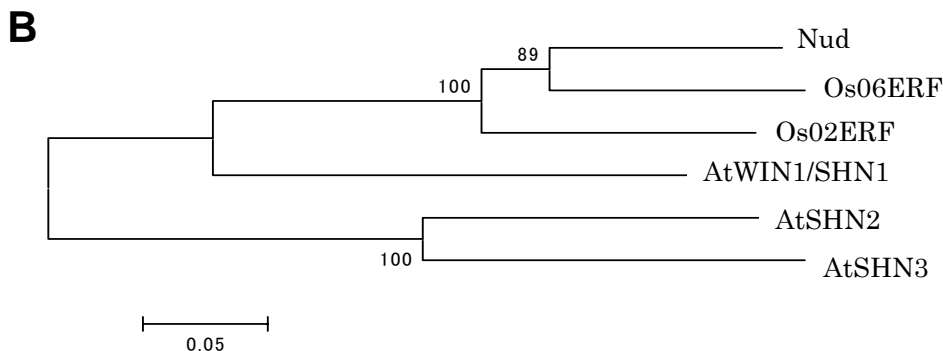

Supplement: pnas_0711034105_2.pdf [file pnas_0711034105_2.pdf]

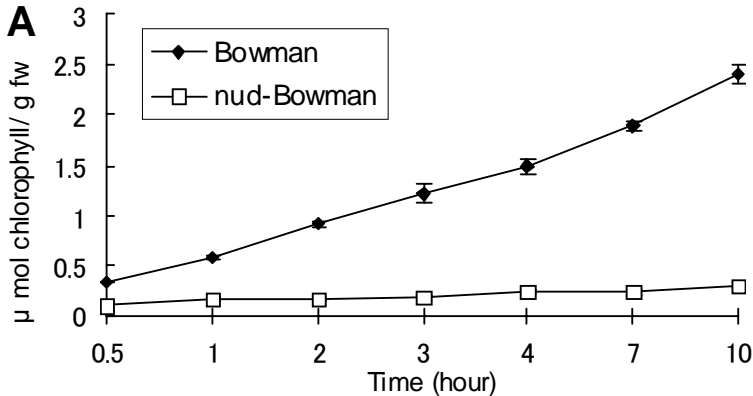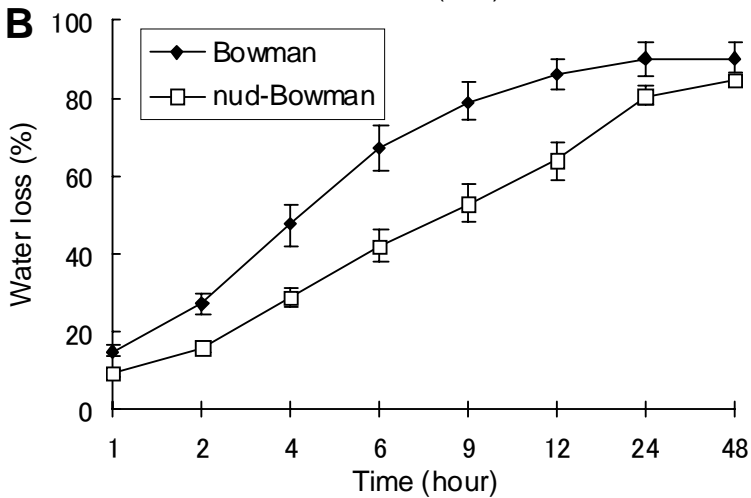

Supplement: pnas_0711034105_3.pdf [file pnas_0711034105_3.pdf]

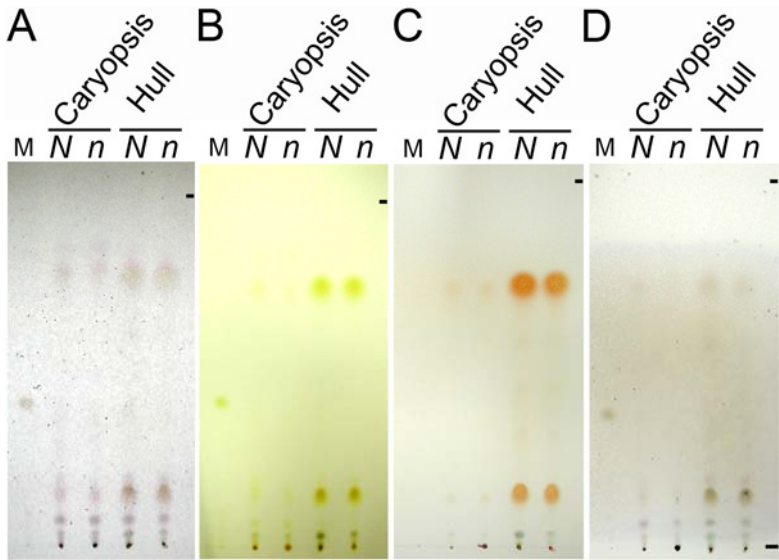

Supplement: pnas_0711034105_4.pdf [file pnas_0711034105_4.pdf]
